# Supplementary material for: Three-Dimensional Presentation of Tumor Histopathology: A Model Using Tongue Squamous Cell Carcinoma
Source: MDPI journal article supplement (doi:10.3390/diagnostics11010109), 2021-01-12
Supplement: s1 [file s1]

**Table S1.** Software selected for further evaluation in our study.

| Software   | Overview                                      | Benefits                                  | Challenges                                          | Price Per Year* |
|------------|-----------------------------------------------|-------------------------------------------|-----------------------------------------------------|-----------------|
| Tinkercad  | 3D CAD design tool                            | Can import .stl<br>ser-friendly interface | Basic modeling only                                 | free            |
| AutoCAD    | 3D CAD design tool                            | Can import .stl files                     | Unable to handle<br>large .stl files                | \$1610 / 2227€  |
| Recap PRO  | 3D models from scans                          | Can import .stl files                     | Meant for converting<br>files into workable<br>form | \$350 / 355€    |
| Fusion360  | Advanced 3D design<br>and model               | Advanced<br>modeling, .stl import         | Requires<br>familiarization                         | \$495 / 503€    |
| Rhinoceros | Advanced 3D design<br>and model               | Advanced<br>modeling, .stl import         | Requires<br>familiarization                         | \$995 / 995€    |
| ImageJ     | Meant for editing<br>histopathological slides | Handles large<br>microscopy images        | Unable to import stl<br>file                        | free            |

\* pricing according to 2020.
